# Supplementary figures and images for: Sourcing and Long-Range Transport of Particulate Organic Matter in River Bedload: Rio Bermejo, Argentina
Source: Copernicus journal article supplement (doi:10.5194/egusphere-2023-2485), 2023-11-13

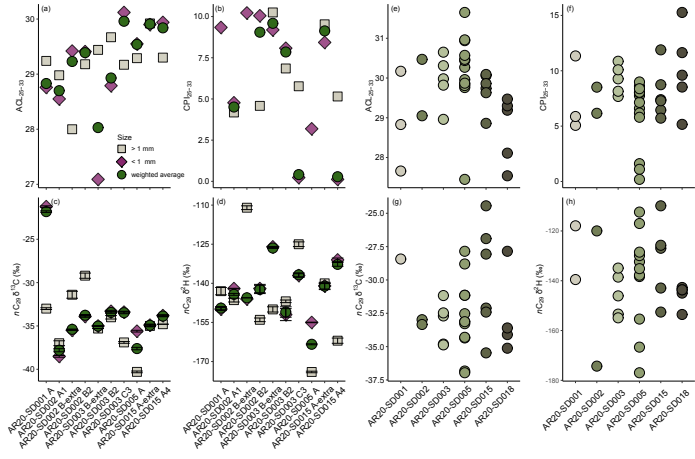

Supplement: Supplementary file 1 [file fig0S1.pdf › FiguresSupplement/fig0S1.pdf]

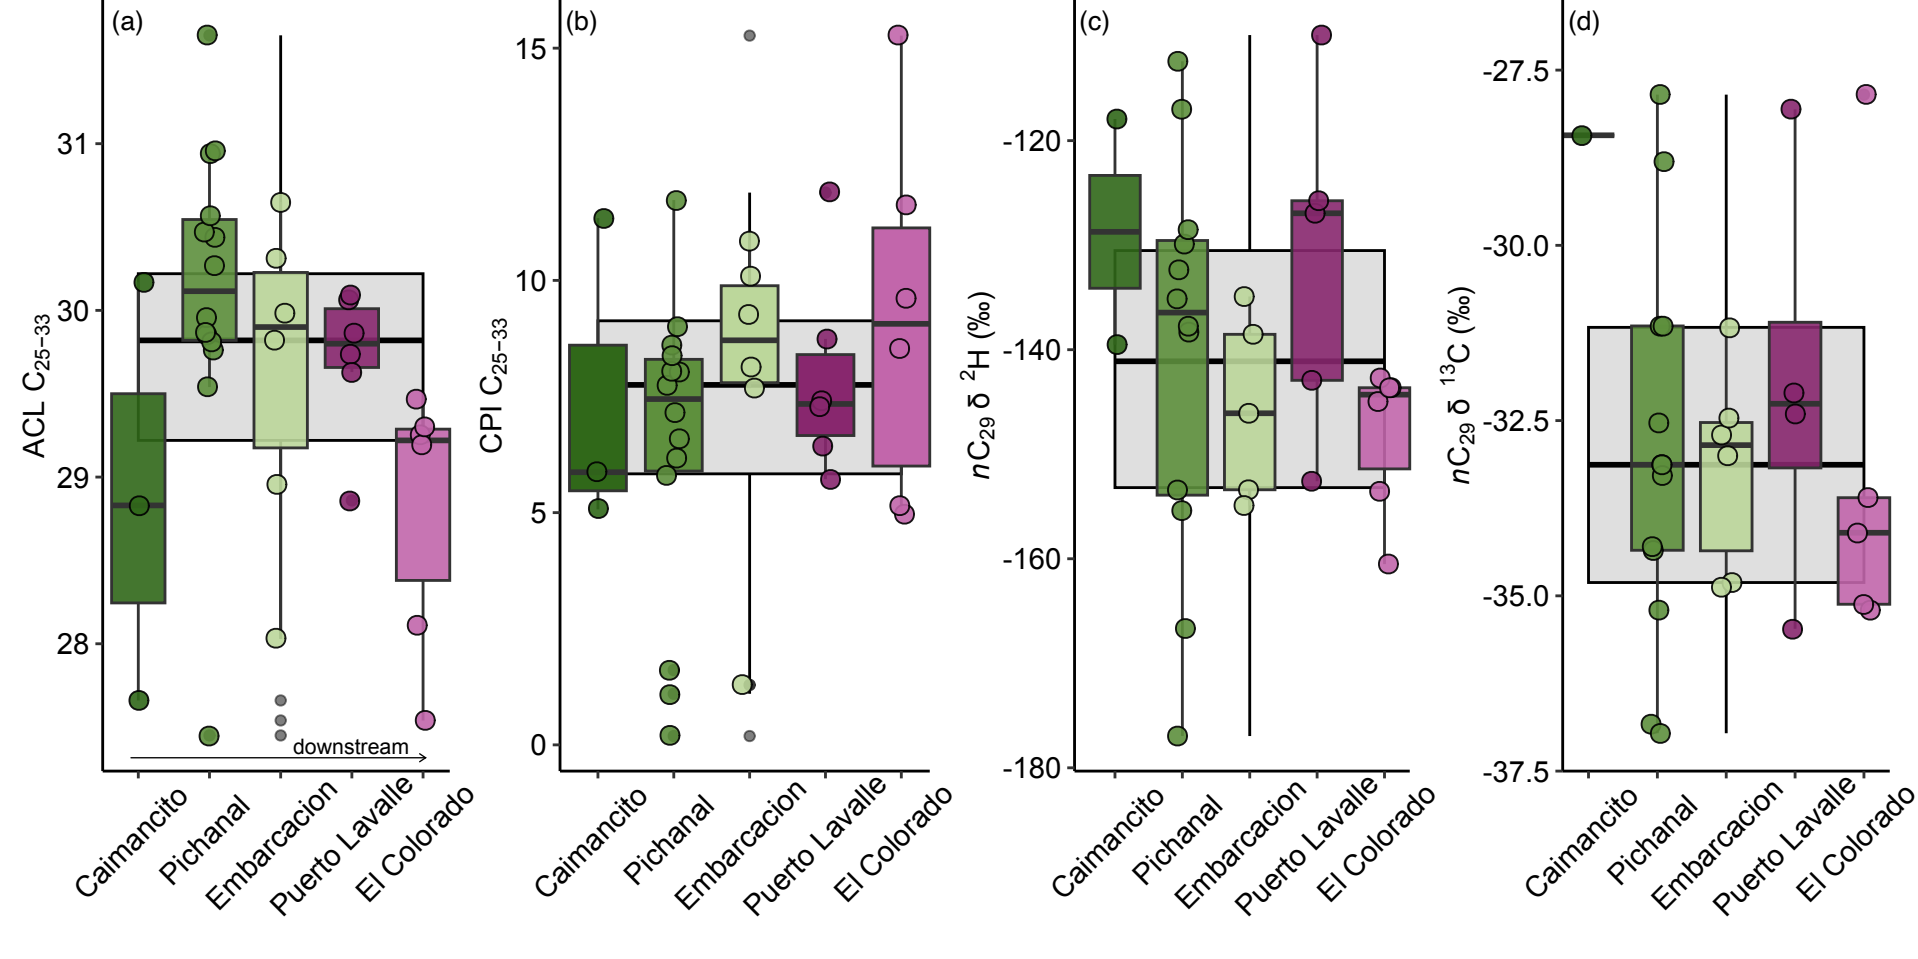

Supplement: Supplementary file 2 [file figS02.pdf › FiguresSupplement/figS02.pdf]
